# Supplementary material
Source: Springer Nature journal article supplement (https://www.springermedizin.de/resource/supplementary/13221_2009_4_MOESM2_ESM.pdf/9675884)

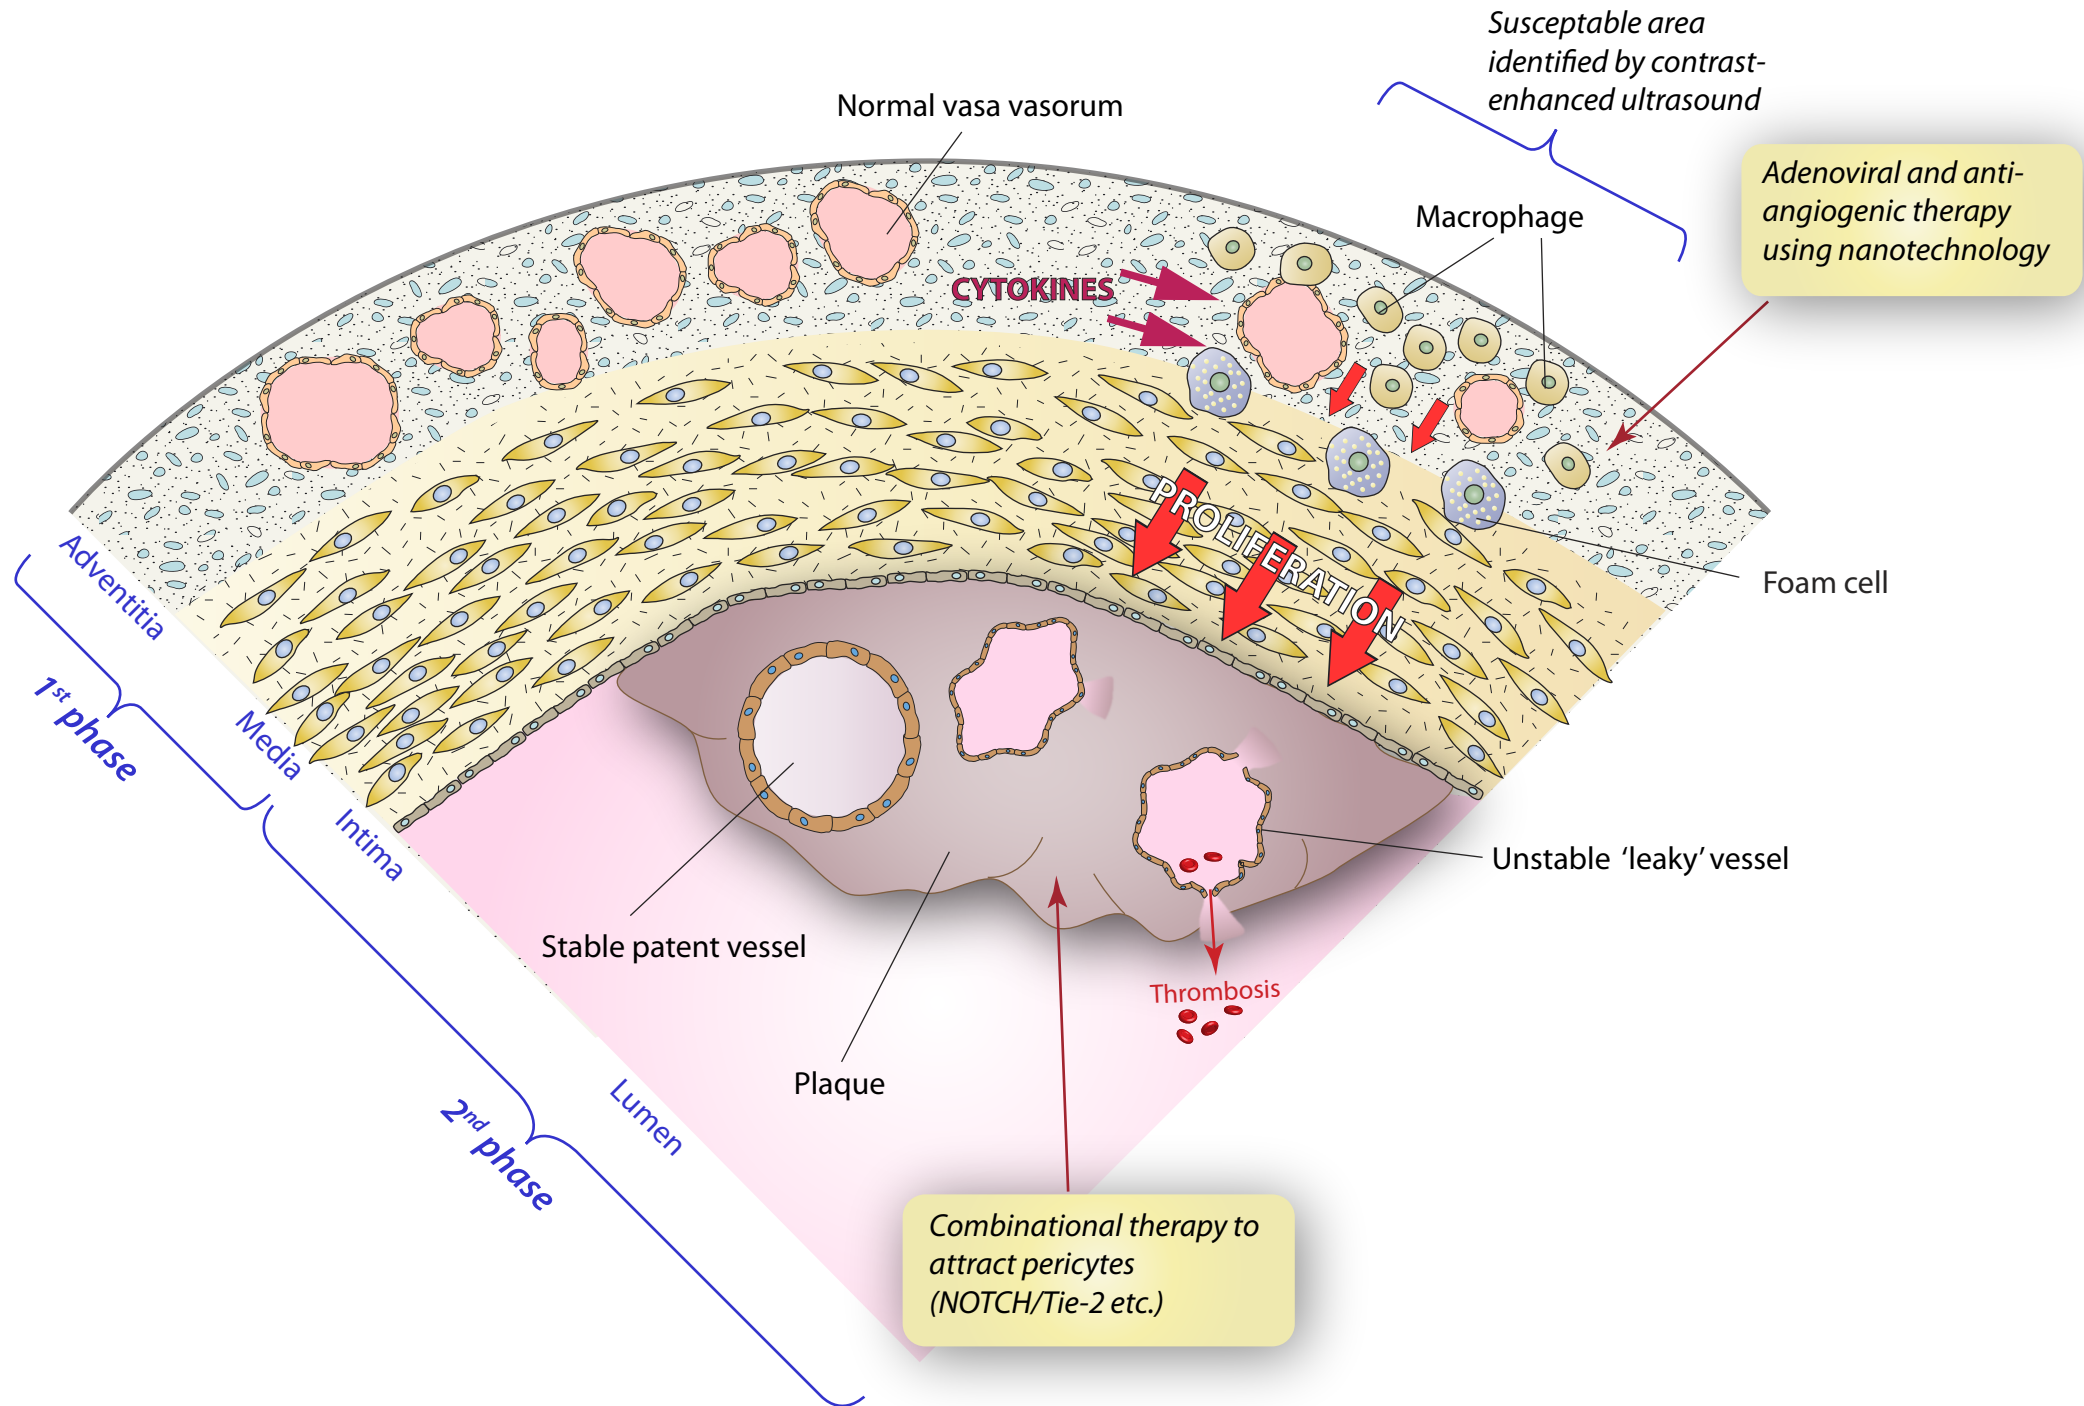

Supplement: MOESM2 [file 9675884]
